# Supplementary figures and images for: Syntheses of deuterium-labeled dihydroartemisinic acid (DHAA) isotopologues and mechanistic studies focused on elucidating the conversion of DHAA to artemisinin
Source: Royal Society of Chemistry journal article supplement (doi:10.1039/d4ob00777h), 2024-01-01

Figure 23

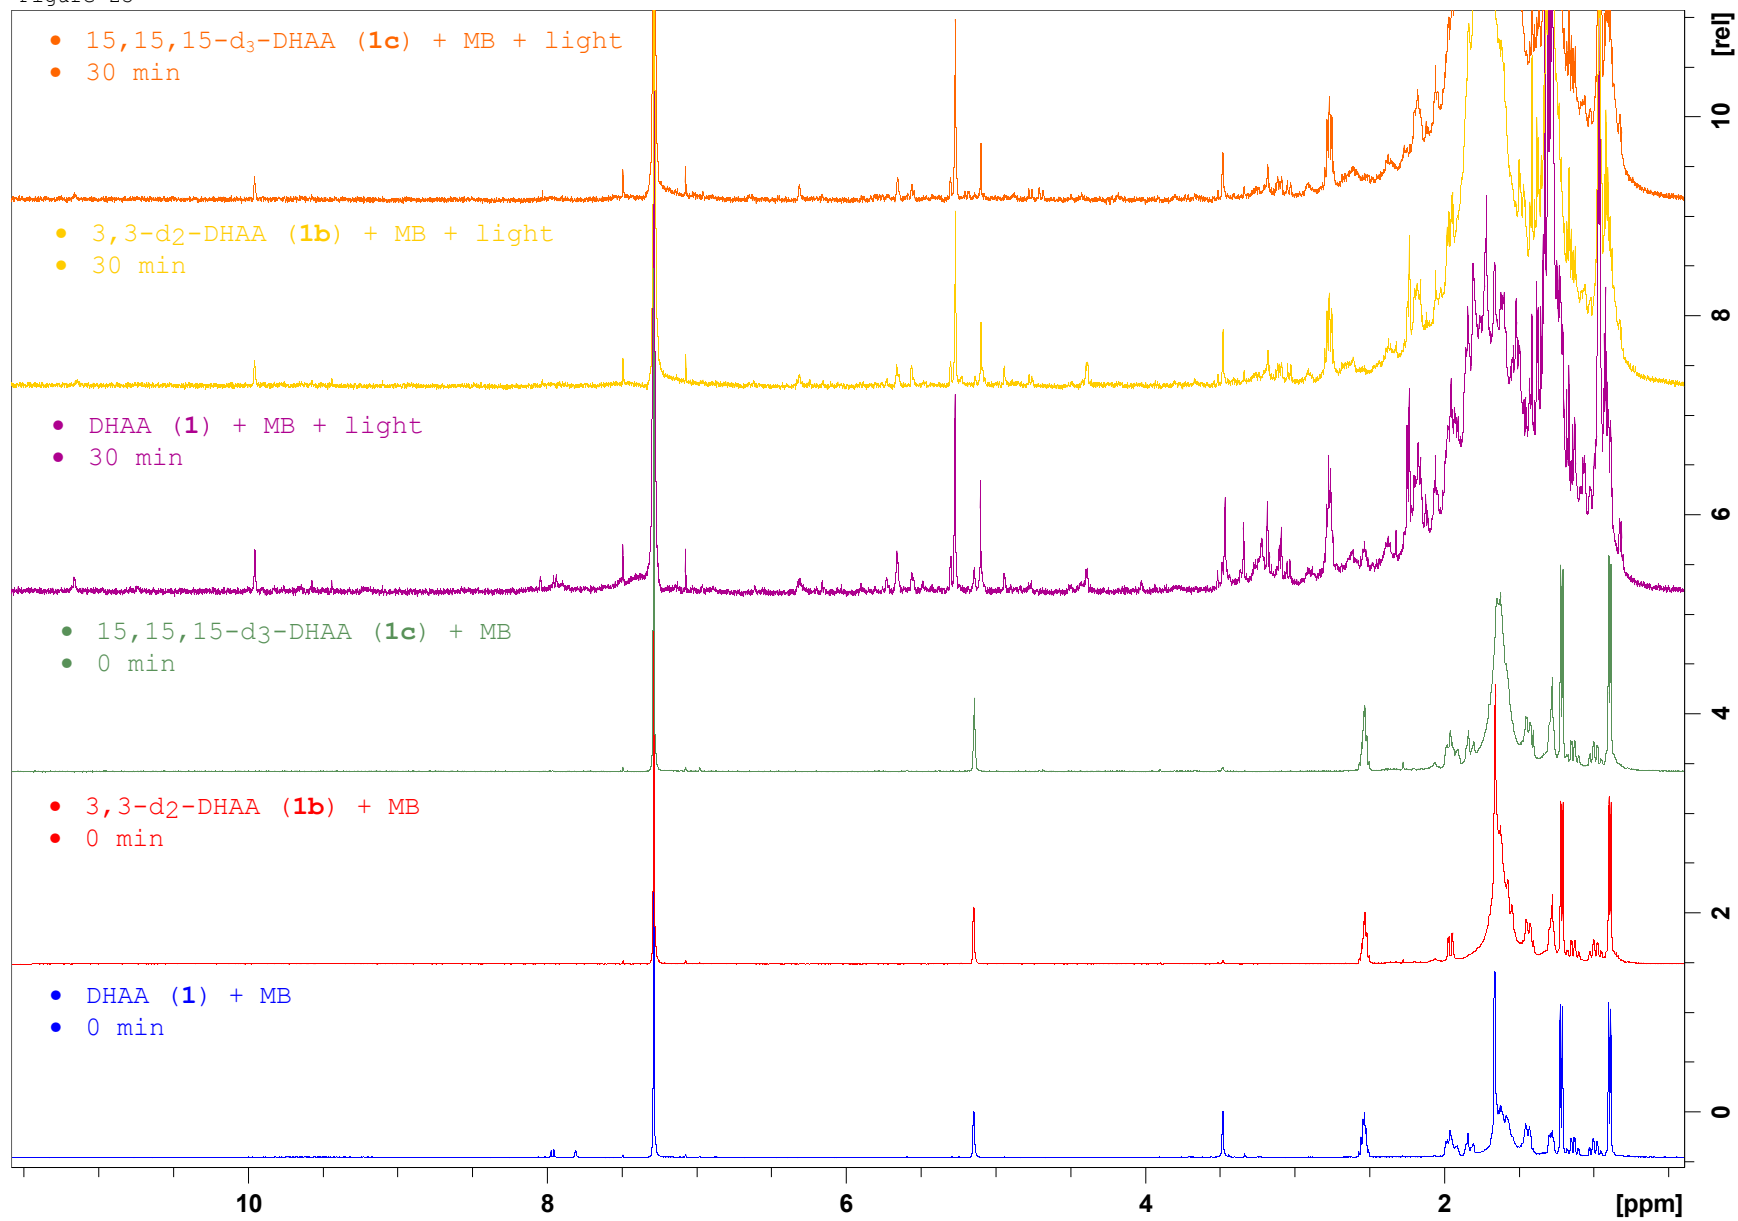

Supplement: d4ob00777h1.pdf [file d4ob00777h1.pdf]
